# Supplementary material
Source: PubMed Central journal article supplement (PMC4167355)
Supplement: NIHMS625549-supplement.pdf [file NIHMS625549-supplement.pdf]

# DEVELOPMENTAL BIOLOGY

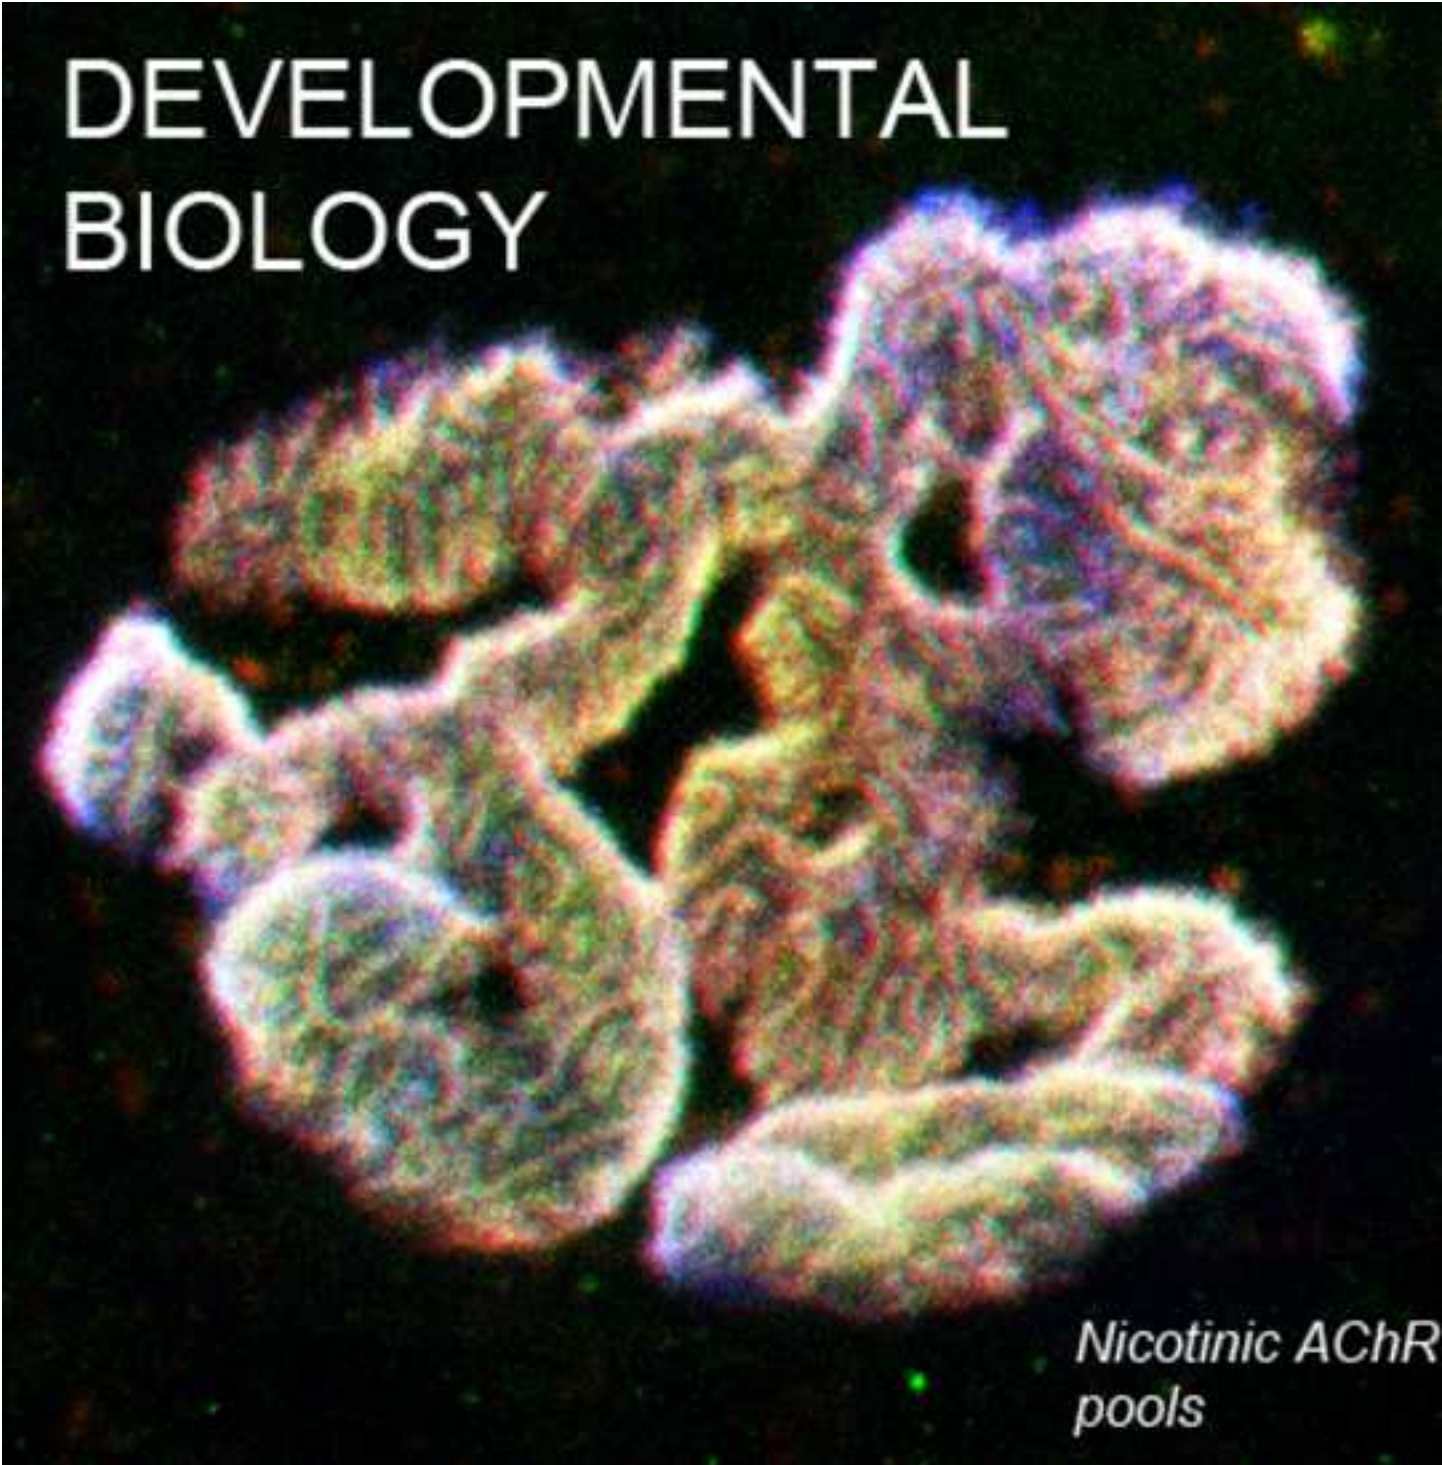

*Nicotinic AChR  
pools*

This fluorescence microscopy image shows several large, irregularly shaped cell clusters or pools. The cells within these pools are stained with multiple fluorescent dyes, resulting in a complex, multi-colored appearance with prominent purple, green, and red signals. The background is dark, which makes the brightly stained cells stand out. The overall structure of the pools is somewhat interconnected and irregular.
